# Supplementary material
Source: PubMed Central journal article supplement (PMC6583700)
Supplement: jamasurg-153-1028-s001.pdf [file jamasurg-153-1028-s001.pdf]

## Supplementary Online Content

Ratti F, Fiorentini G, Cipriani F, Catena M, Paganelli M, Aldrighetti L.

Laparoscopic vs open surgery for colorectal liver metastases. *JAMA Surg.*

Published online July 18, 2018. doi:10.1001/jamasurg.2018.2107

**eFigure 1.** Number of Procedures Performed for Colorectal Liver Metastasis, Stratified According to Open or Laparoscopic Approach

**eFigure 2.** Trend in the Ratio of Laparoscopic/Total Resections for Colorectal Liver Metastasis Over Years

This supplementary material has been provided by the authors to give readers additional information about their work.

**eFigure 1.** Number of Procedures Performed for Colorectal Liver Metastasis, Stratified According to Open or Laparoscopic Approach

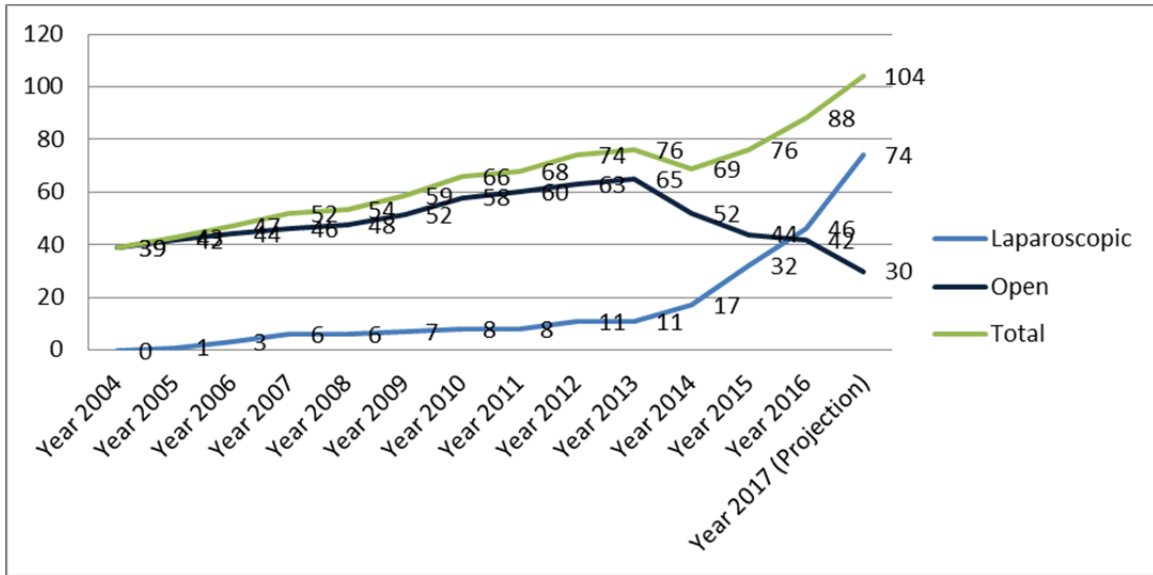

**eFigure 2.** Trend in the Ratio of Laparoscopic/Total Resections for Colorectal Liver Metastasis Over Years

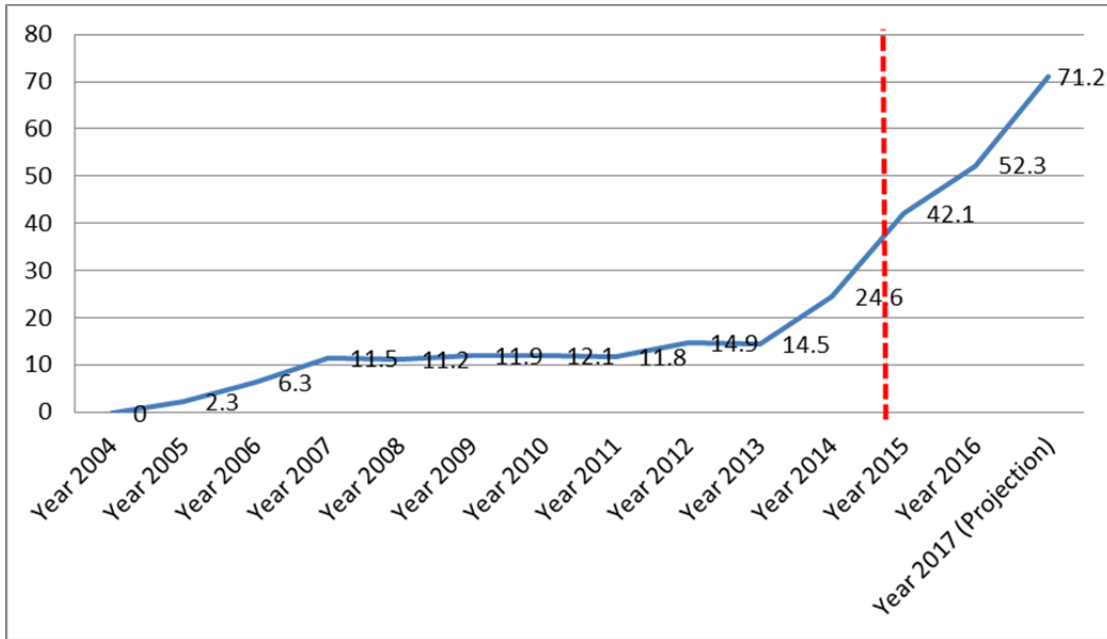

The red line indicates the threshold of 30%.
